# Supplementary material for: Evaluating the Performance of ChatGPT in Ophthalmology: An Analysis of Its Successes and Shortcomings
Source: PubMed Central journal article supplement — Ophthalmol Sci. 2023 May 5;3(4):100324. doi: 10.1016/j.xops.2023.100324 (PMC10272508; doi:10.1016/j.xops.2023.100324), 2023-05-05

**Supplemental Figure 3: Post hoc analysis using Tukey’s test to isolate the effect of exam section and difficulty index using all questions for the legacy model. (A)** Bar plot of the percentage of accuracy by exam section. The blue square brackets identify the significant differences. The significant contrasts were the following: General Medicine – Glaucoma (estimate 0.424,  $p=0.002$ ), General Medicine - Neuro-Ophthalmology (estimate 0.486,  $p<0.001$ ) and General Medicine - Pathology and Tumors (estimate 0.367,  $p=0.029$ ). **(B)** Predicted percentage of accuracy by difficulty index. Accuracy increased with increasing difficulty index (easier questions).

**(A)**

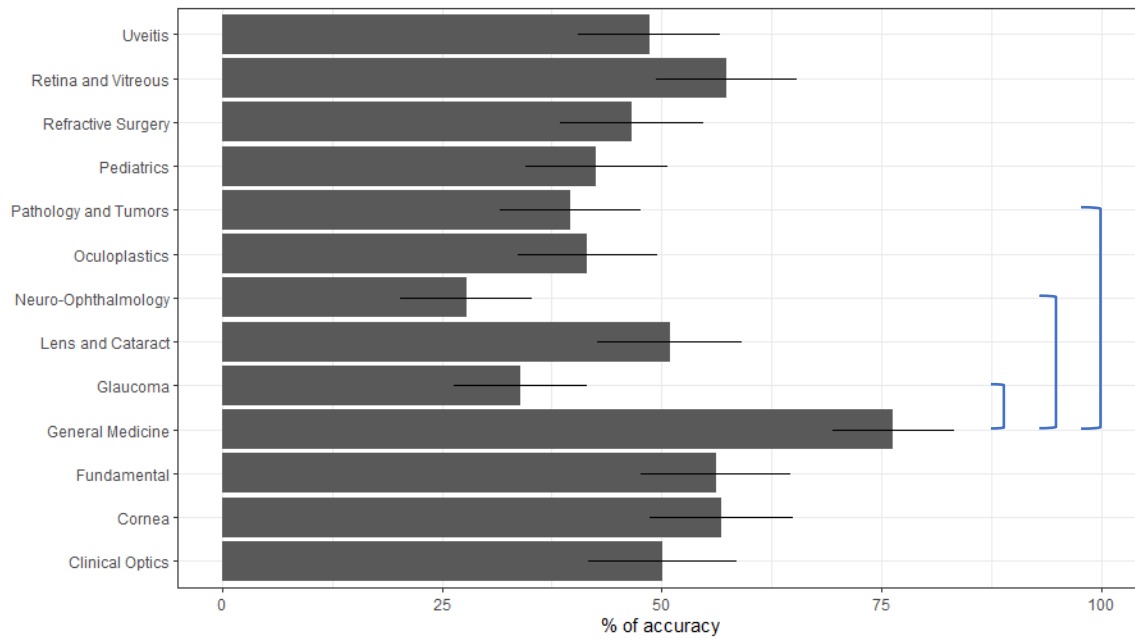

**(B)**

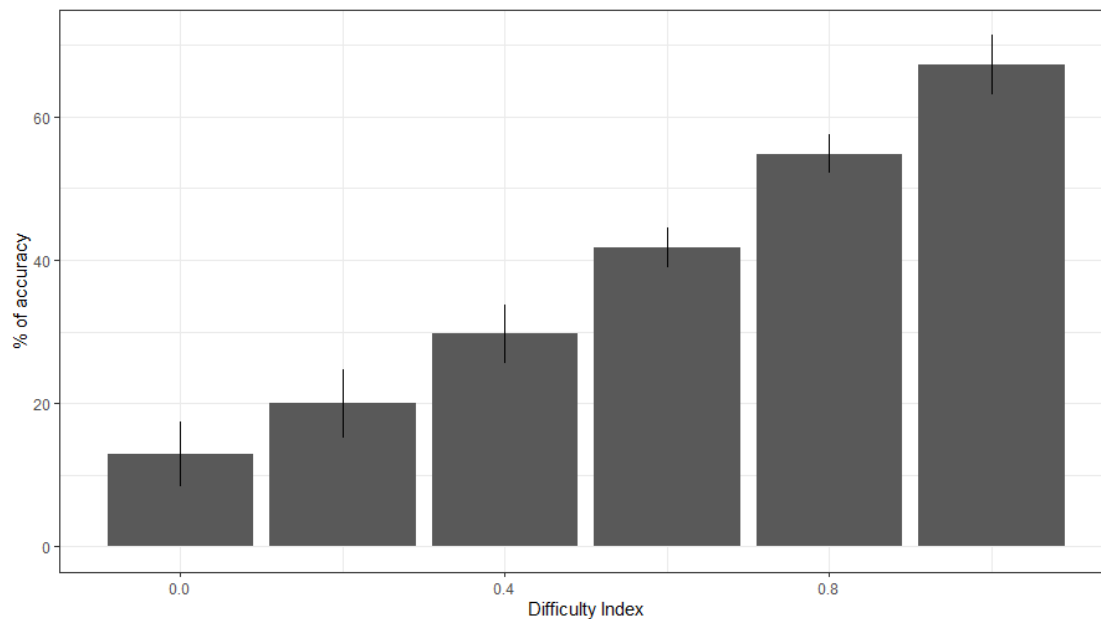

Supplement: mmc1.pdf [file mmc1.pdf]
