# Supplementary material for: Evaluating the Performance of ChatGPT in Ophthalmology: An Analysis of Its Successes and Shortcomings
Source: PubMed Central journal article supplement — Ophthalmol Sci. 2023 May 5;3(4):100324. doi: 10.1016/j.xops.2023.100324 (PMC10272508; doi:10.1016/j.xops.2023.100324), 2023-05-05

**Supplemental Figure 5: Post hoc analysis using Tukey's test to isolate the effect of exam section and difficulty index using the OphthoQuestions questions for the legacy model.**

**(A)** Bar plot of the percentage of accuracy by exam section. The blue square brackets identify the significant differences. The significant contrasts were the following: Clinical Optics - General Medicine (estimate -0.501,  $p=0.028$ ), Cornea - Neuro-Ophthalmology (estimate 0.506,  $p=0.013$ ), Fundamentals - Neuro-Ophthalmology (estimate 0.518,  $p=0.016$ ), General Medicine - Glaucoma (estimate 0.538,  $p=0.004$ ), General Medicine - Neuro-Ophthalmology (estimate 0.638,  $p<0.001$ ), General Medicine - Pediatrics (estimate 0.552,  $p=0.004$ ) and Neuro-Ophthalmology- Uveitis (estimate -0.536,  $p=0.004$ ). **(B)** Predicted percentage of accuracy by difficulty index. Accuracy increased with increasing difficulty index (easier questions).

**(A)**

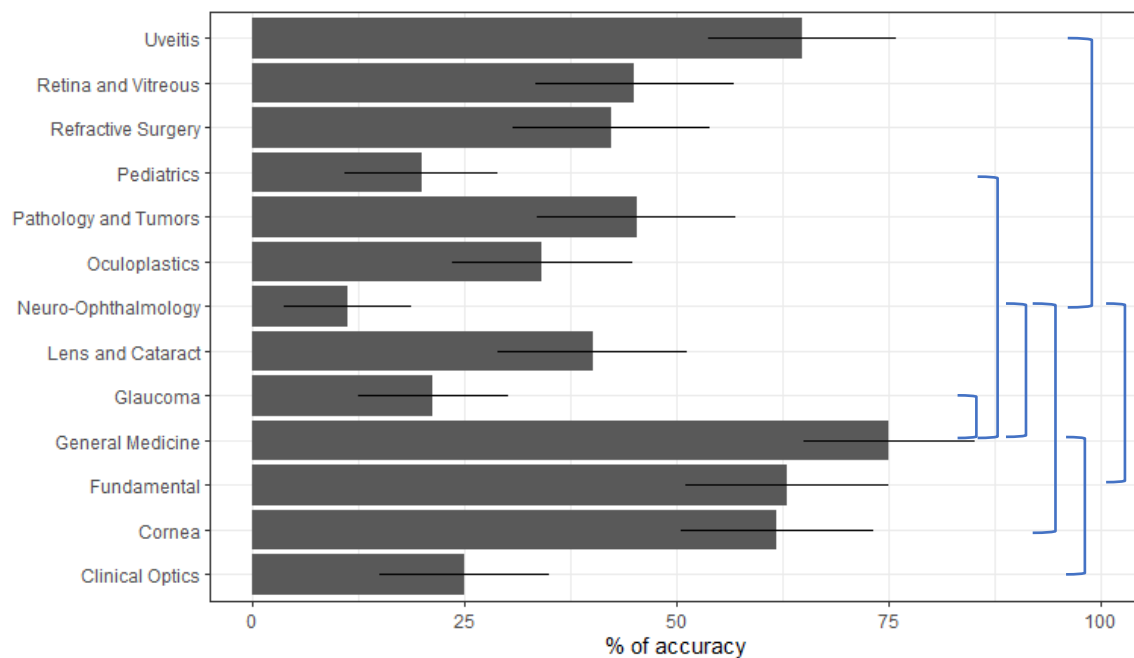

**(B)**

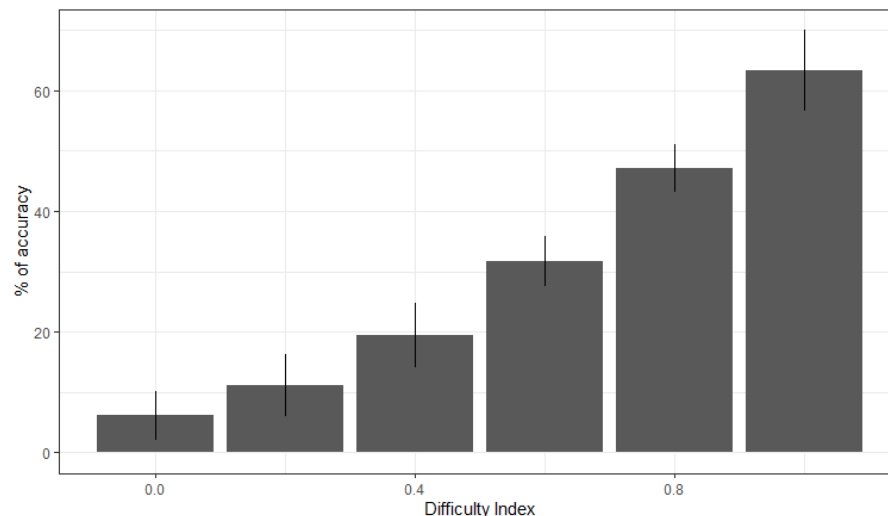

Supplement: mmc3.pdf [file mmc3.pdf]
