# Supplementary material for: Evaluating the Performance of ChatGPT in Ophthalmology: An Analysis of Its Successes and Shortcomings
Source: PubMed Central journal article supplement — Ophthalmol Sci. 2023 May 5;3(4):100324. doi: 10.1016/j.xops.2023.100324 (PMC10272508; doi:10.1016/j.xops.2023.100324), 2023-05-05

**Supplemental Figure 6: Post hoc analysis using Tukey's test to isolate the effect of exam section and difficulty index using all questions for ChatGPT Plus. (A)** Bar plot of the percentage of accuracy by exam section. There were no differences in performance across the exam sections. **(B)** Predicted percentage of accuracy by difficulty index. Accuracy increased with increasing difficulty index (easier questions).

**(A)**

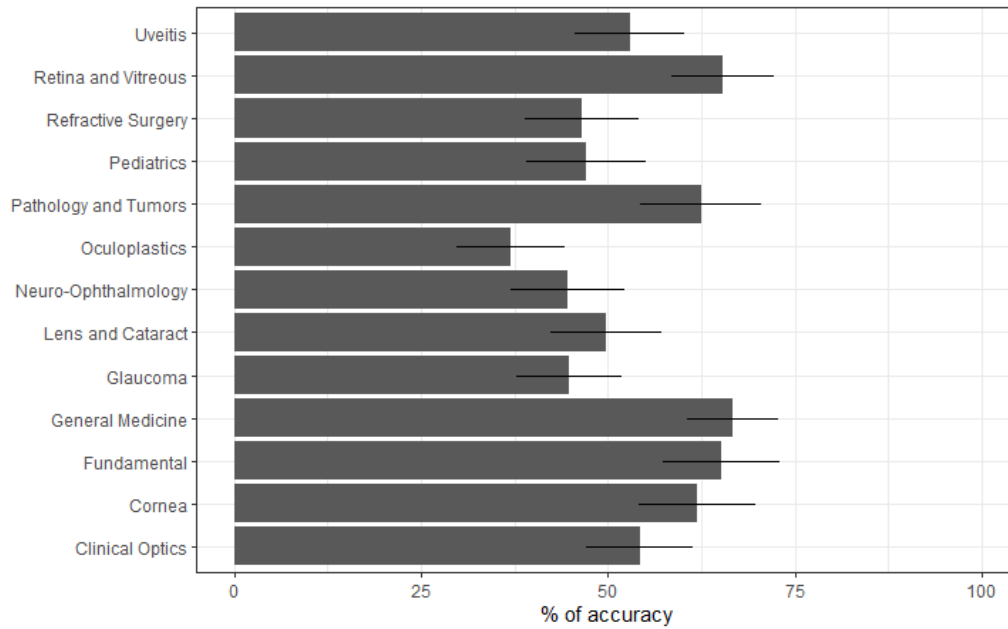

**(B)**

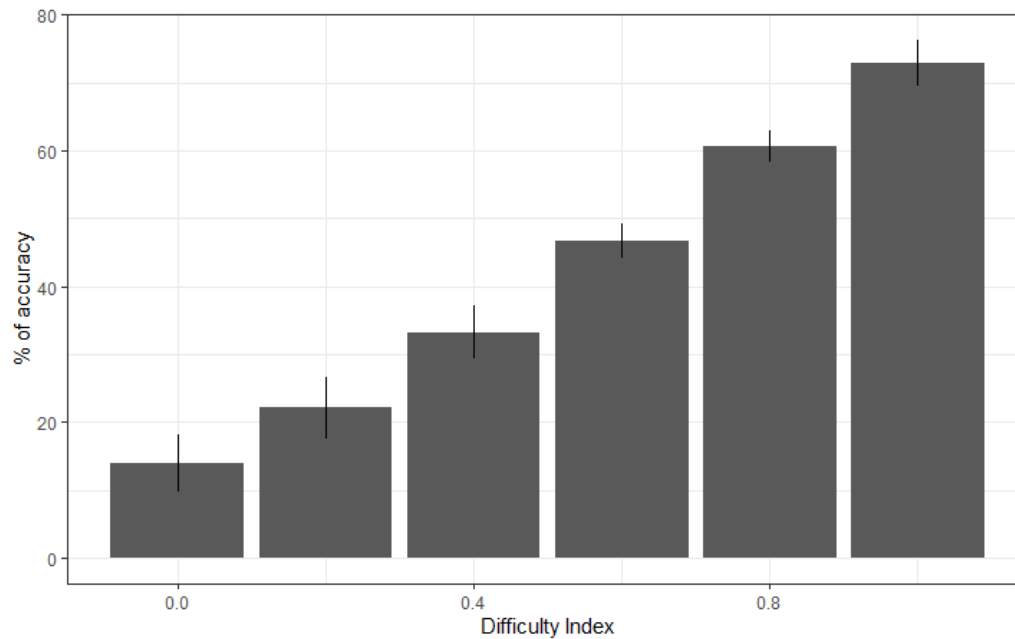

Supplement: mmc4.pdf [file mmc4.pdf]
