# Supplementary material for: Evaluating the Performance of ChatGPT in Ophthalmology: An Analysis of Its Successes and Shortcomings
Source: PubMed Central journal article supplement — Ophthalmol Sci. 2023 May 5;3(4):100324. doi: 10.1016/j.xops.2023.100324 (PMC10272508; doi:10.1016/j.xops.2023.100324), 2023-05-05

**Supplemental Figure 8: Post hoc analysis using Tukey's test to isolate the effect of exam section and difficulty index using the OphthoQuestions questions for ChatGPT Plus. (A)**

Bar plot of the percentage of accuracy by exam section. The grey square brackets identify the significant differences. The significant contrasts were the following: Cornea – Glaucoma (estimate 0.438,  $p=0.046$ ), Fundamentals – Glaucoma (estimate 0.457,  $p=0.034$ ) and General Medicine – Glaucoma (estimate 0.463,  $p=0.009$ ) (B) Predicted percentage of accuracy by difficulty index. Accuracy increased with increasing difficulty index (easier questions).

**(A)**

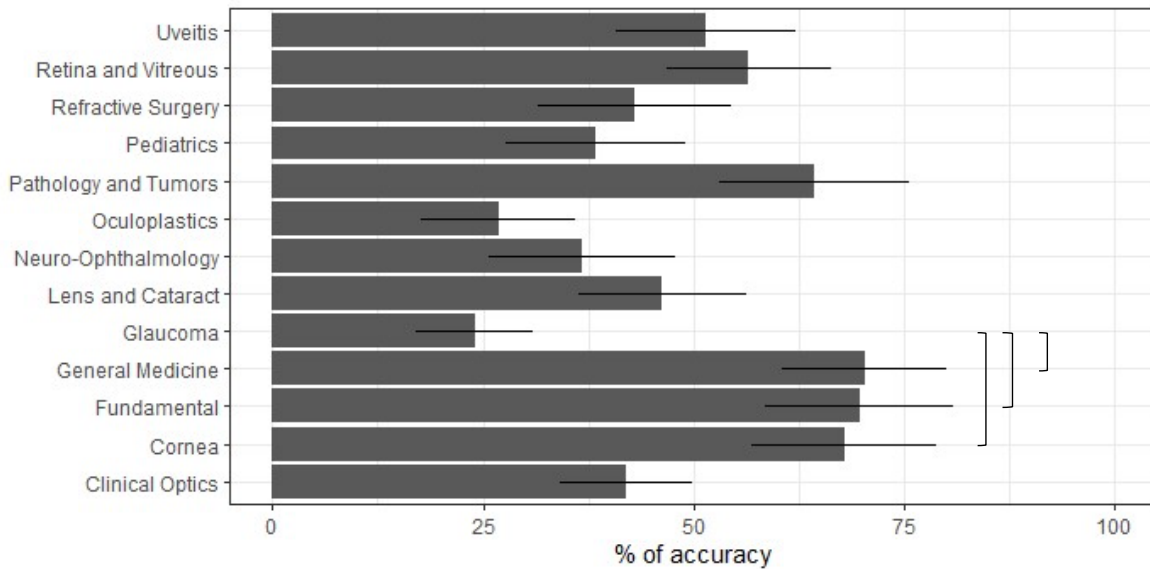

**(B)**

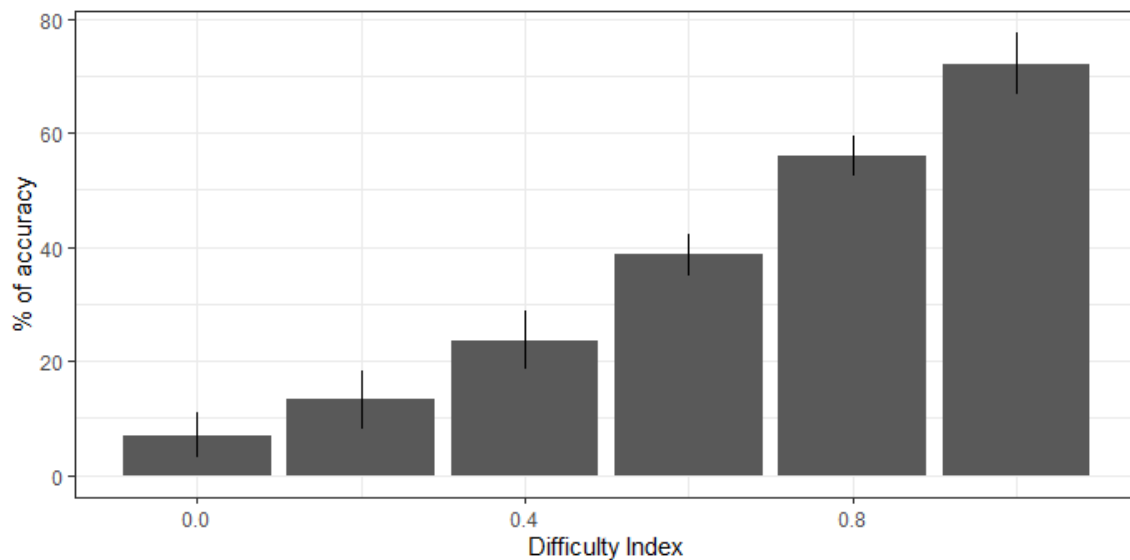

Supplement: mmc6.pdf [file mmc6.pdf]
