# Supplementary material for: Evaluating the Performance of ChatGPT in Ophthalmology: An Analysis of Its Successes and Shortcomings
Source: PubMed Central journal article supplement — Ophthalmol Sci. 2023 May 5;3(4):100324. doi: 10.1016/j.xops.2023.100324 (PMC10272508; doi:10.1016/j.xops.2023.100324), 2023-05-05
Supplement: mmc7.pdf [file mmc7.pdf]

**Supplemental Table 2: ChatGPT models performance per exam section for each of the BCSC and OphthoQuestions testing sets**

| Exam section             | BCSC (n=260) |                                  |             |             |             | OphthoQuestions (n=260) |                                  |             |             |             |
|--------------------------|--------------|----------------------------------|-------------|-------------|-------------|-------------------------|----------------------------------|-------------|-------------|-------------|
|                          | Jan 9        | Plus*                            |             |             |             | Jan 9                   | Plus*                            |             |             |             |
|                          |              | Mean $\pm$ SD                    | 1           | 2           | 3           |                         | Mean $\pm$ SD                    | 1           | 2           | 3           |
| General Medicine         | 75           | 60.0 $\pm$ 4.1                   | 65          | 55          | 60          | 75                      | 71.7 $\pm$ 2.4                   | 75          | 70          | 70          |
| Fundamentals             | 55           | 63.3 $\pm$ 2.4                   | 60          | 65          | 65          | 65                      | 73.3 $\pm$ 2.4                   | 75          | 75          | 70          |
| Clinical Optics          | 60           | 51.7 $\pm$ 6.2                   | 45          | 50          | 60          | 25                      | 40.0 $\pm$ 8.2                   | 50          | 30          | 40          |
| Pathology/ Tumors        | 40           | 65.0 $\pm$ 0.0                   | 65          | 65          | 65          | 45                      | 63.3 $\pm$ 6.2                   | 65          | 55          | 70          |
| Neuro-ophthalmology      | 40           | 48.3 $\pm$ 2.4                   | 50          | 45          | 50          | 10                      | 31.7 $\pm$ 2.4                   | 30          | 35          | 30          |
| Pediatrics&Strabismus    | 65           | 56.7 $\pm$ 2.4                   | 55          | 60          | 55          | 20                      | 36.7 $\pm$ 4.7                   | 40          | 40          | 30          |
| Oculoplastics            | 50           | 48.3 $\pm$ 4.7                   | 45          | 55          | 45          | 40                      | 33.3 $\pm$ 2.4                   | 35          | 35          | 30          |
| Cornea                   | 60           | 63.3 $\pm$ 2.4                   | 60          | 65          | 65          | 60                      | 66.7 $\pm$ 2.4                   | 65          | 65          | 70          |
| Uveitis                  | 35           | 56.7 $\pm$ 4.7                   | 60          | 50          | 60          | 65                      | 51.7 $\pm$ 2.4                   | 55          | 50          | 50          |
| Glaucoma                 | 50           | 68.3 $\pm$ 2.4                   | 70          | 65          | 70          | 25                      | 28.3 $\pm$ 2.4                   | 30          | 25          | 30          |
| Lens and Cataract        | 65           | 56.7 $\pm$ 2.4                   | 55          | 60          | 55          | 45                      | 51.7 $\pm$ 4.7                   | 45          | 55          | 55          |
| Retina and Vitreous      | 75           | 78.3 $\pm$ 2.4                   | 80          | 80          | 75          | 40                      | 51.7 $\pm$ 2.4                   | 50          | 55          | 50          |
| Refractive Surgery       | 55           | 55.0 $\pm$ 0.0                   | 55          | 55          | 55          | 40                      | 40.0 $\pm$ 4.1                   | 40          | 45          | 35          |
| <b>Mean Accuracy (%)</b> | <b>55.8</b>  | <b>59.4 <math>\pm</math> 0.6</b> | <b>58.9</b> | <b>59.2</b> | <b>60.0</b> | <b>42.7</b>             | <b>49.2 <math>\pm</math> 1.0</b> | <b>50.4</b> | <b>48.8</b> | <b>48.5</b> |

\* The mean and standard deviations for the ChatGPT Plus model were calculated using data from runs 1, 2, and 3
