# Supplementary material for: Evaluating the Performance of ChatGPT in Ophthalmology: An Analysis of Its Successes and Shortcomings
Source: PubMed Central journal article supplement — Ophthalmol Sci. 2023 May 5;3(4):100324. doi: 10.1016/j.xops.2023.100324 (PMC10272508; doi:10.1016/j.xops.2023.100324), 2023-05-05
Supplement: mmc9.pdf [file mmc9.pdf]

**Supplemental Table 5: Likelihood ratio test for exam section, cognitive level, and difficulty index for each of the BCSC and OphthoQuestions sets for ChatGPT Plus**

| <b>Effects</b>         | <b>LR Chisq</b> | <b>Df</b> | <b>Pr(&gt;Chisq)</b> |
|------------------------|-----------------|-----------|----------------------|
| <b>BCSC</b>            |                 |           |                      |
| Section                | 7.98            | 12        | 0.787*               |
| Cognitive level        | 4.88            | 1         | 0.027*               |
| Difficulty index       | 16.66           | 1         | <0.001*              |
| <b>OphthoQuestions</b> |                 |           |                      |
| Section                | 26.42           | 12        | 0.009*               |
| Cognitive level        | 0.62            | 1         | 0.43                 |
| Difficulty index       | 18.25           | 1         | <0.001*              |

\* Statistically significant at the 0.05 level
