# Supplementary material for: Evaluating the Performance of ChatGPT in Ophthalmology: An Analysis of Its Successes and Shortcomings
Source: PubMed Central journal article supplement — Ophthalmol Sci. 2023 May 5;3(4):100324. doi: 10.1016/j.xops.2023.100324 (PMC10272508; doi:10.1016/j.xops.2023.100324), 2023-05-05
Supplement: mmc10.pdf [file mmc10.pdf]

**Supplemental Table 6: ChatGPT Plus performance per exam section compared to human performances from the BCSC and OphthoQuestions sets**

| Exam section                | BCSC (n=260) |                   | OphthoQuestions (n=260) |                   |
|-----------------------------|--------------|-------------------|-------------------------|-------------------|
|                             | Humans*      | ChatGPT Plus      | Humans**                | ChatGPT Plus      |
| General Medicine            | 73           | 60.0 ± 4.1        | 67.3 ± 0.6              | 71.7 ± 2.4        |
| Fundamentals                | 69           | 63.3 ± 2.4        | 67.3 ± 4.7              | 73.3 ± 2.4        |
| Clinical Optics             | 64           | 51.7 ± 6.2        | 53.7 ± 4.9              | 40.0 ± 8.2        |
| Pathology/ Tumors           | 71           | 65.0 ± 0.0        | 57.3 ± 3.8              | 63.3 ± 6.2        |
| Neuro-ophthalmology         | 73           | 48.3 ± 2.4        | 64.0 ± 5.3              | 31.7 ± 2.4        |
| Pediatrics&Strabismus       | 74           | 56.7 ± 2.4        | 58.0 ± 5.3              | 36.7 ± 4.7        |
| Oculoplastics               | 75           | 48.3 ± 4.7        | 72.0 ± 4.6              | 33.3 ± 2.4        |
| Cornea                      | 78           | 63.3 ± 2.4        | 61.7 ± 4.9              | 66.7 ± 2.4        |
| Uveitis                     | 75           | 56.7 ± 4.7        | 63.3 ± 5.0              | 51.7 ± 2.4        |
| Glaucoma                    | 73           | 68.3 ± 2.4        | 64.7 ± 4.2              | 28.3 ± 2.4        |
| Lens and Cataract           | 77           | 56.7 ± 2.4        | 67.7 ± 5.9              | 51.7 ± 4.7        |
| Retina and Vitreous         | 75           | 78.3 ± 2.4        | 59.7 ± 5.9              | 51.7 ± 2.4        |
| Refractive Surgery          | 76           | 55.0 ± 0.0        | 62.3 ± 4.6              | 40.0 ± 4.1        |
| <b>Mean Accuracy (%)***</b> | <b>73.3</b>  | <b>59.4 ± 0.6</b> | <b>63.0 ± 4.5</b>       | <b>49.2 ± 1.0</b> |

\* The BCSC Self-Assessment Program provides average peer scores without breakdown per year of training or any historical data

\*\* OphthoQuestions provides historical data that corresponds to the user's year of training. To calculate the mean accuracies and standard deviations, we used data from 3 consecutive years of training: 1st year (2019 – 2020), 2nd year (2020 – 2021) and 3rd year (2021 – 2022)

\*\*\* The mean accuracies per section and overall are provided solely for general comparison purposes, and they reflect the average performance on the BCSC and OphthoQuestions testing sets, which comprise around 4,458 and 4,539 questions, respectively. It should be noted that these figures do not reflect the mean accuracies for the 520 question sample exams that were used to assess ChatGPT's performance, as this specific data cannot be obtained
